# Supplementary material for: SlHSP17.7 Ameliorates Chilling Stress-Induced Damage by Regulating Phosphatidylglycerol Metabolism and Calcium Signal in Tomato Plants
Source: MDPI journal article supplement (doi:10.3390/plants11141865), 2022-07-18
Supplement: s1 [file s1]

**Table S1: List of primers used in this paper**

| GeneID           | Name                  | Sequence                 |
|------------------|-----------------------|--------------------------|
| Solyc11g005330.1 | Actin-F               | TGTCCCTATTTACGAGGGTTATGC |
| Solyc11g005330.1 | Actin-R               | AGTTAAATCACGACCAGCAAGAT  |
| Solyc06g076540.1 | 17.7-F                | CACCGAAGGAGGAAGGAAAGTGG  |
| Solyc06g076540.1 | 17.7-R                | TTTGCGTTCTCTGGAAGTC      |
| Solyc11g020040.1 | HSP70-F               | TCAAACCTTGAGTGTCTGCTAT   |
| Solyc11g020040.1 | HSP70-R               | CAGTGGGCTCATTGATTATTCG   |
| Solyc06g036290.2 | HSP90-F               | GTGTGGATGTTGATGATATGCC   |
| Solyc06g036290.2 | HSP90-R               | GACTCGGAAGAACAACAACA     |
| Solyc06g053960.2 | HSFA-6b-F             | AGGAGTGTCTTCATGAGAATGG   |
| Solyc06g053960.2 | HSFA-6b-R             | CGTCGTTGTTACTTGGATCATC   |
| Solyc06g069730.2 | Cab12-F               | GGCTTAACCTCTCCTACTTACC   |
| Solyc06g069730.2 | Cab12-R               | GTCTGATTTTCCAGCATCGTAC   |
| Solyc08g005610.2 | ABA8'-hydroxylase-1-F | CTATCAGAAACATCATCCCCGA   |
| Solyc08g005610.2 | ABA8'-hydroxylase-1-R | AGTGTACCGGGGAGATTAATTG   |
| Solyc02g079180.1 | HSFA-1b-F             | GGAACGACAGGCTATAGATGAA   |
| Solyc02g079180.1 | HSFA-1b-R             | CTCTAATACGTCTAGTTGCCGT   |
| Solyc06g071060.1 | NADPHF                | TGGAAGCAATGGTGAAGATACT   |
| Solyc06g071060.1 | NADPHR                | CATTGACACGAATGATCTGTCC   |
| Solyc12g094620.1 | CAT1F                 | AGAAGATACCTGAACGTGTTGT   |
| Solyc12g094620.1 | CAT1R                 | GTTACCCTCTCTGGTGTAGAAC   |
| Solyc02g078460.2 | RING-F                | CAGGGGTTGAAGCTAAGTTAGA   |
| Solyc02g078460.2 | RING-R                | TAAAACTGGAAGTGTACAGGCA   |
| Solyc11g066390.2 | SOD-F                 | ATGGTCCAACCTACGGTTAATGT  |

|                  |               |                                    |
|------------------|---------------|------------------------------------|
| Solyc11g066390.2 | SOD-R         | AGGAGCTCCATGTGTCAATTTA             |
| Solyc07g006370.1 | CCX1LIKE-F    | CCCGGGTAGGGATGTCTGTTTCTT           |
| Solyc07g006370.1 | CCX1LIKE-R    | GGCGCGCCAAGTCACCCATAGAGTTT         |
| Solyc10g080930.2 | MED26b-F      | TGCTGCTGTTGATTGTCC                 |
| Solyc10g080930.2 | MED26b-R      | CCACCAAACATCCTTACTC                |
| Solyc10g080930.2 | MED26b vigs-F | CCGGATCCATGGCGAAGAGTAGTGGGAC       |
| Solyc10g080930.2 | MED26b vigs-R | CCCTCGAGATCTATCCTACTGTAACTTTGCTCTC |
|                  | vigs-F        | GATTCTGTGAGTAAGGTTACC              |
|                  | vigs-R        | CTTCAGACACGGATCTAC                 |

---

**Table S2: Differentially expressed genes (DEGs) of photosynthesis before chilling stress ( $q < 0.05$ ,  $|\log_2| \geq 1$ )**

| GeneID           | Description                                                                                          | log2 (Fold change) | Regulation |
|------------------|------------------------------------------------------------------------------------------------------|--------------------|------------|
| Solyc00g500130.1 | photosystem II protein D1 [Nicotiana tabacum]                                                        | -1.609853888       | down       |
| Solyc00g500329.1 | photosystem II protein D1 [Nicotiana tabacum]                                                        | -1.629386585       | down       |
| Solyc00g500071.1 | photosystem II 47 kDa protein [Nicotiana tabacum]                                                    | -1.733368334       | down       |
| Solyc00g500024.1 | photosystem II 47 kDa protein [Nicotiana tabacum]                                                    | -1.808817279       | down       |
| Solyc06g060340.3 | photosystem II subunit S [Solanum lycopersicum]                                                      | -1.99790134        | down       |
| Solyc00g500056.1 | photosystem I P700 apoprotein A2 [Solanum bulbocastanum]                                             | -2.040377707       | down       |
| Solyc00g500057.1 | photosystem I P700 apoprotein A1 [Solanum bulbocastanum]                                             | -2.471799934       | down       |
| Solyc00g500200.1 | photosystem II protein D1 [Nicotiana tabacum]                                                        | -2.700341438       | down       |
| Solyc00g500139.1 | photosystem I P700 apoprotein A1 [Solanum bulbocastanum]                                             | -3.61821403        | down       |
| Solyc00g500138.1 | photosystem I P700 apoprotein A2 [Solanum bulbocastanum]                                             | -3.951049902       | down       |
|                  | photosynthetic reaction centre, L/M, Photosystem antenna protein-like protein, plastid (chloroplast) |                    |            |
| Solyc00g500136.1 | [Artemisia annua]                                                                                    | -6.830590817       | down       |
| Solyc03g005260.3 | ATP sulfurylase 1, chloroplastic [Solanum lycopersicum]                                              | -1.016338005       | down       |
| Solyc02g092450.3 | calcium-transporting ATPase 2, plasma membrane-type-like isoform X2 [Solanum lycopersicum]           | -1.148683903       | down       |
| Solyc00g500345.1 | ATP synthase subunit 1 (mitochondrion) [Solanum lycopersicum]                                        | -1.232840136       | down       |
| Solyc12g089010.3 | pre-mRNA-splicing factor ATP-dependent RNA helicase DEAH7-like isoform X2 [Solanum pennellii]        | -1.282770093       | down       |
| Solyc00g500203.1 | ATP synthase CF1 alpha subunit [Solanum bulbocastanum]                                               | -1.349312635       | down       |
| Solyc01g104930.3 | vesicle-fusing ATPase [Solanum lycopersicum]                                                         | -1.383818851       | down       |
| Solyc00g500063.1 | ATP synthase CF1 beta subunit (chloroplast) [Solanum lycopersicum]                                   | -1.586133228       | down       |
| Solyc02g070990.1 | chlorophyll a-b binding protein 1, chloroplastic [Solanum lycopersicum]                              | -1.020989005       | down       |
| Solyc12g006140.2 | chlorophyll a-b binding protein 5, chloroplastic [Solanum lycopersicum]                              | -1.090373582       | down       |
| Solyc08g066360.3 | NADP-dependent malic enzyme isoform X1 [Solanum lycopersicum]                                        | -1.428353872       | down       |

|                  |                                                                               |             |    |
|------------------|-------------------------------------------------------------------------------|-------------|----|
| Solyc07g055900.1 | ATP-dependent DNA helicase PIF1 [Solanum lycopersicum]                        | 1.044063798 | up |
|                  | LOW QUALITY PROTEIN: DExH-box ATP-dependent RNA helicase DExH12-like [Solanum |             |    |
| Solyc06g071620.3 | lycopersicum]                                                                 | 1.144314058 | up |
| Solyc06g063330.3 | vacuolar H <sup>+</sup> -ATPase A2 subunit isoform [Solanum lycopersicum]     | 7.277112144 | up |
| Solyc02g071030.2 | chlorophyll a-b binding protein 1B, chloroplastic [Solanum lycopersicum]      | 1.238903221 | up |

---

**Table S3: Differentially expressed genes (DEGs) of photosynthesis after chilling stress for 12h ( $q < 0.05$ ,  $|\log_2| \geq 1$ )**

| GeneID           | Description                                                                                                            | log2 (Fold change) | Regulation |
|------------------|------------------------------------------------------------------------------------------------------------------------|--------------------|------------|
| Solyc05g010240.4 | ruBisCO large subunit-binding protein subunit beta, chloroplastic isoform X2 [Solanum lycopersicum]                    | -1.171733135       | down       |
| Solyc10g006530.4 | photosynthetic NDH subunit of lumenal location 3, chloroplastic [Solanum lycopersicum]                                 | -1.164372788       | down       |
| Solyc05g007780.3 | photosynthetic NDH subunit of lumenal location 2, chloroplastic isoform X1 [Solanum lycopersicum]                      | -1.170458934       | down       |
| Solyc03g062720.3 | photosynthetic NDH subunit of subcomplex B 2, chloroplastic [Solanum lycopersicum]                                     | -1.685692476       | down       |
| Solyc00g500136.1 | photosynthetic reaction centre, L/M, Photosystem antenna protein-like protein, plastid (chloroplast) [Artemisia annua] | -1.824836258       | down       |
| Solyc00g500206.1 | photosynthetic reaction centre, L/M, Photosystem antenna protein-like protein, plastid (chloroplast) [Artemisia annua] | -2.567216651       | down       |
| Solyc00g500054.1 | photosynthetic reaction centre, L/M, Photosystem antenna protein-like protein, plastid (chloroplast) [Artemisia annua] | #NUM!              | down       |
| Solyc09g076030.4 | photosystem II D1 precursor processing protein PSB27-H2, chloroplastic [Solanum lycopersicum]                          | -1.037646477       | down       |
| Solyc12g009200.2 | photosystem I chlorophyll a/b-binding protein 6, chloroplastic [Solanum lycopersicum]                                  | -1.224356005       | down       |
| Solyc00g500130.1 | photosystem II protein D1 [Nicotiana tabacum]                                                                          | -1.229438205       | down       |
| Solyc00g500296.1 | photosystem II protein D1 [Nicotiana tabacum]                                                                          | -1.369999785       | down       |
| Solyc09g064500.3 | photosystem II reaction center Psb28 protein [Solanum lycopersicum]                                                    | -1.442698311       | down       |
| Solyc00g500024.1 | photosystem II 47 kDa protein [Nicotiana tabacum]                                                                      | -1.765651186       | down       |
| Solyc00g500136.1 | photosynthetic reaction centre, L/M, Photosystem antenna protein-like protein, plastid (chloroplast) [Artemisia annua] | -1.824836258       | down       |
| Solyc00g500208.1 | photosystem I P700 apoprotein A2 [Solanum bulbocastanum]                                                               | -1.860966071       | down       |
| Solyc00g500071.1 | photosystem II 47 kDa protein [Nicotiana tabacum]                                                                      | -1.864580717       | down       |
| Solyc06g060340.3 | photosystem II subunit S [Solanum lycopersicum]                                                                        | -2.009254498       | down       |
| Solyc00g500329.1 | photosystem II protein D1 [Nicotiana tabacum]                                                                          | -2.107967508       | down       |
| Solyc00g500056.1 | photosystem I P700 apoprotein A2 [Solanum bulbocastanum]                                                               | -2.29436619        | down       |

|                  |                                                                                                                                                                  |              |      |
|------------------|------------------------------------------------------------------------------------------------------------------------------------------------------------------|--------------|------|
| Solyc00g500209.1 | photosystem I P700 apoprotein A1 [Solanum bulbocastanum]<br>photosynthetic reaction centre, L/M, Photosystem antenna protein-like protein, plastid (chloroplast) | -2.299832152 | down |
| Solyc00g500206.1 | [Artemisia annua]                                                                                                                                                | -2.567216651 | down |
| Solyc00g500057.1 | photosystem I P700 apoprotein A1 [Solanum bulbocastanum]<br>photosynthetic reaction centre, L/M, Photosystem antenna protein-like protein, plastid (chloroplast) | -2.793768426 | down |
| Solyc00g500054.1 | [Artemisia annua]                                                                                                                                                | #NUM!        | down |
| Solyc04g040160.4 | protochlorophyllide-dependent translocon component 52, chloroplastic [Solanum lycopersicum]                                                                      | -1.069442561 | down |
| Solyc12g009200.2 | photosystem I chlorophyll a/b-binding protein 6, chloroplastic [Solanum lycopersicum]                                                                            | -1.224356005 | down |
| Solyc06g053980.3 | chlorophyllase-2, chloroplastic [Solanum lycopersicum]                                                                                                           | -1.295304466 | down |
| Solyc09g076030.4 | photosystem II D1 precursor processing protein PSB27-H2, chloroplastic [Solanum lycopersicum]                                                                    | -1.037646477 | down |
| Solyc04g064670.3 | psbP domain-containing protein 4, chloroplastic [Solanum lycopersicum]                                                                                           | -1.062748351 | down |
| Solyc04g009420.3 | psbP domain-containing protein 2, chloroplastic [Solanum lycopersicum]                                                                                           | -1.339528305 | down |
| Solyc09g064500.3 | photosystem II reaction center Psb28 protein [Solanum lycopersicum]                                                                                              | -1.442698311 | down |
| Solyc05g055700.3 | 2-alkenal reductase (NADP(+)-dependent) [Solanum lycopersicum]                                                                                                   | -1.120839689 | down |
| Solyc07g005390.3 | NADP-dependent glyceraldehyde-3-phosphate dehydrogenase [Solanum lycopersicum]                                                                                   | -1.201293201 | down |
| Solyc10g007600.3 | glycolate oxidase [Solanum lycopersicum]                                                                                                                         | -1.091505684 | down |
| Solyc06g005950.3 | ATP-dependent zinc metalloprotease FTSH 9, chloroplastic [Solanum lycopersicum]                                                                                  | -1.047236831 | down |
| Solyc12g042950.2 | plastidic ATP/ADP-transporter [Solanum lycopersicum]                                                                                                             | -1.077806677 | down |
| Solyc00g500332.1 | ATP synthase CF1 alpha subunit [Solanum bulbocastanum]                                                                                                           | -1.134744834 | down |
| Solyc07g055320.4 | ATP-dependent zinc metalloprotease FTSH 2, chloroplastic [Solanum lycopersicum]                                                                                  | -1.161824464 | down |
| Solyc02g062780.4 | ATP-dependent DNA helicase DDM1-like isoform X1 [Solanum lycopersicum]                                                                                           | -1.172198706 | down |
| Solyc12g010870.3 | ATP synthase I-like protein [Solanum lycopersicum]                                                                                                               | -1.248645187 | down |
| Solyc02g094100.4 | ATPase family AAA domain-containing protein FIGL1 [Solanum lycopersicum]                                                                                         | -2.316528145 | down |
| Solyc09g065620.3 | chlorophyllase-2, chloroplastic isoform X1 [Solanum lycopersicum]                                                                                                | 1.493444712  | up   |
| Solyc06g069730.3 | chlorophyll a-b binding protein Cab12 [Solanum lycopersicum]                                                                                                     | 1.581458337  | up   |
| Solyc06g071060.1 | NADPH-dependent aldehyde reductase-like protein, chloroplastic [Solanum lycopersicum]                                                                            | 1.044281288  | up   |

|                  |                                                                                               |             |    |
|------------------|-----------------------------------------------------------------------------------------------|-------------|----|
| Solyc12g010960.2 | 2-alkenal reductase (NADP(+)-dependent)-like [Solanum lycopersicum]                           | 2.172239946 | up |
| Solyc09g082870.3 | putative calcium-transporting ATPase 13, plasma membrane-type [Solanum lycopersicum]          | 1.203052028 | up |
| Solyc02g084900.2 | AAA-ATPase At2g18193-like [Solanum lycopersicum]                                              | 1.265429595 | up |
| Solyc02g092450.3 | calcium-transporting ATPase 2, plasma membrane-type-like isoform X2 [Solanum lycopersicum]    | 1.68166333  | up |
| Solyc03g033840.4 | AAA-ATPase At3g50940-like [Solanum lycopersicum]                                              | 1.78374191  | up |
| Solyc06g071620.3 | LOW QUALITY PROTEIN: DExH-box ATP-dependent RNA helicase DExH12-like [Solanum lycopersicum]   | 1.864074807 | up |
| Solyc12g017700.2 | pre-mRNA-splicing factor ATP-dependent RNA helicase DEAH1 isoform X2 [Solanum lycopersicum]   | 2.185965998 | up |
| Solyc00g500140.1 | ATP synthase CF1 epsilon subunit [Solanum bulbocastanum]                                      | 2.458253873 | up |
| Solyc12g089010.3 | pre-mRNA-splicing factor ATP-dependent RNA helicase DEAH7-like isoform X2 [Solanum pennellii] | 3.125920245 | up |
| Solyc06g063330.3 | vacuolar H <sup>+</sup> -ATPase A2 subunit isoform [Solanum lycopersicum]                     | 6.18292852  | up |

---

**Table S4 List of co-expressed MED and HSP genes.**

| Gene           | Description                                                                                               | Rank |
|----------------|-----------------------------------------------------------------------------------------------------------|------|
| <b>HSP17.7</b> | 17.7 kDa class II heat shock protein [Source:UniProtKB/Swiss-Prot;Acc:O81822]                             | N/A  |
| HSP17.6C       | 17.6 kDa class I heat shock protein 3 [Source:UniProtKB/Swiss-Prot;Acc:P13853]                            | 1    |
| HSP17.6        | 17.6 kDa class II heat shock protein [Source:UniProtKB/Swiss-Prot;Acc:P29830]                             | 2    |
| HSP17.4A       | 17.4 kDa class I heat shock protein [Source:UniProtKB/Swiss-Prot;Acc:P19036]                              | 3    |
| MED37C         | Probable mediator of RNA polymerase II transcription subunit 37c [Source:UniProtKB/Swiss-Prot;Acc:Q9LHA8] | 4    |
| HSP23.6        | HSP23.6-MITO [Source:UniProtKB/TrEMBL;Acc:A0A178USN5]                                                     | 5    |
| HSP17.4B       | 17.4 kDa class III heat shock protein [Source:UniProtKB/Swiss-Prot;Acc: Q9SYG1]                           | 6    |
| HSP22.0        | 22.0 kDa heat shock protein [Source:UniProtKB/Swiss-Prot;Acc:Q38806]                                      | 7    |
| HSP17.6B       | 17.6 kDa class I heat shock protein 2 [Source:UniProtKB/Swiss-Prot;Acc:Q9ZW31]                            | 8    |
| HSP23.5        | 23.5 kDa heat shock protein, mitochondrial [Source:UniProtKB/Swiss-Prot;Acc:Q9FGM9]                       | 9    |
| HSP70-3        | Heat shock protein 70 (Hsp 70) family protein [Source:UniProtKB/TrEMBL;Acc:A0A178VI76]                    | 10   |
| HSP15.7        | 15.7 kDa heat shock protein, peroxisomal [Source:UniProtKB/Swiss-Prot;Acc:Q9FHQ3]                         | 11   |
| HSP21          | HSP21 [Source:UniProtKB/TrEMBL;Acc:A0A178UVU5]                                                            | 12   |
| MED37D         | Probable mediator of RNA polymerase II transcription subunit 37c                                          | 13   |



|           |                                                                                                              |    |
|-----------|--------------------------------------------------------------------------------------------------------------|----|
|           | [Source:UniProtKB/Swiss-Prot;Acc:P22954]                                                                     |    |
| HSP26.5   | 26.5 kDa heat shock protein, mitochondrial [Source:UniProtKB/Swiss-Prot;Acc:Q9SSQ8]                          | 14 |
| MED37E    | Probable mediator of RNA polymerase II transcription subunit 37e<br>[Source:UniProtKB/Swiss-Prot;Acc:P22953] | 15 |
| HSP18.1   | 18.1 kDa class I heat shock protein [Source:UniProtKB/Swiss-Prot;Acc:P19037]                                 | 16 |
| CLPB1     | Chaperone protein ClpB1 [Source:UniProtKB/Swiss-Prot;Acc:P42730]                                             | 17 |
| AT1G54400 | HSP20-like chaperones superfamily protein [Source:UniProtKB/TrEMBL;Acc:F4HWW7]                               | 18 |
| AT5G20970 | HSP20-like chaperones superfamily protein [Source:UniProtKB/TrEMBL;Acc:F4K6X6]                               | 19 |
| HSP70-5   | Hsp70b [Source:UniProtKB/TrEMBL;Acc:A0A178W9N7]                                                              | 20 |

---
